# Supplementary material for: Systems Pharmacological Approach to the Effect of Bulsu-san Promoting Parturition
Source: Evid Based Complement Alternat Med. 2017 Oct 29;2017:7236436. doi: 10.1155/2017/7236436 (PMC5682096; doi:10.1155/2017/7236436)
Supplement: Supplementary file 1 — Table S1: 314 Compounds of BSS (189 molecules of CG and 125 of DG). [file 7236436.f1.xlsx]

## Sheet: Table S1
herb name	TCMSP Mol ID	Molecule Name	MW	AlogP	Hdon	Hacc	OB (%)	Caco-2	DL
DG	MOL008278	4-chloro-N-[1-methyl-5-[[1-methyl-5-[[1-methyl-5-(2-morpholinoethylcarbamoyl)pyrrol-3-yl]carbamoyl]pyrrol-3-yl]carbamoyl]pyrrol-3-yl]-5-[2-(2-pyridyl)ethylamino]isothiazole-3-carboxamide	762.38	2.93	5	13	7.18	-0.21	0.31
DG	MOL008290	lecithin	678.06	8.77	0	8	0.31	0.16	0.4
DG	MOL008247	L-beta,gamma-Dimyristoyl-alpha-cephalin	635.97	9.49	3	9	20.69	-0.43	0.47
DG	MOL008254	Isotetandrine	622.82	7.22	0	8	10.42	0.95	0.1
CG	MOL000357	Sitogluside	576.95	6.34	4	6	20.63	-0.14	0.62
DG	MOL000357	Sitogluside	576.95	6.34	4	6	20.63	-0.14	0.62
CG	MOL002158	xiongterpene	574.87	8.12	2	5	23.77	0.44	0.42
CG	MOL002205	Octatriacontane	535.16	17.71	0	0	7.91	1.99	0.37
DG	MOL008253	sphingomyelin	493.73	3.18	3	7	0.31	-0.46	0.51
CG	MOL002114	augustic-acid	472.78	5.46	3	4	21.08	0.18	0.74
CG	MOL000433	FA	441.45	0.01	7	13	68.96	-1.5	0.71
DG	MOL000359	beta-sitosterol	414.79	8.08	1	1	36.91	1.32	0.75
CG	MOL000359	sitosterol	414.79	8.08	1	1	36.91	1.32	0.75
DG	MOL000449	Stigmasterol	412.77	7.64	1	1	43.83	1.44	0.76
CG	MOL002157	wallichilide	412.57	4.82	0	5	42.31	0.82	0.71
DG	MOL008248	phosphatidylinositol	390.27	-3.85	6	13	4.63	-2.34	0.29
CG	MOL002103	Senkyunolide-P	382.54	5.22	0	4	9.38	0.92	0.81
DG	MOL004613	6,7,3',8'-diligustilide	380.52	5.17	0	4	9.83	0.79	0.7
CG	MOL002102	Levistolid A	380.52	4.97	0	4	2.15	0.94	0.82
DG	MOL002102	Levistolid A	380.52	4.97	0	4	2.15	0.94	0.82
CG	MOL002200	Levistolide-A	380.52	4.97	0	4	9.96	0.96	0.82
CG	MOL002109	Z-6,8',7,3'-diligustilide	380.52	5.17	0	4	11.98	0.74	0.7
CG	MOL002135	Myricanone	356.45	4.1	2	5	40.6	0.67	0.51
DG	MOL008288	Coniferyl ferulate	356.4	3.64	2	6	4.54	0.71	0.39
CG	MOL002192	Coniferylfcrulate	356.4	3.64	2	6	4.54	0.67	0.39
CG	MOL000842	sucrose	342.34	-4.31	8	11	7.17	-2.89	0.23
CG	MOL002151	senkyunone	326.52	6.32	0	2	47.66	1.15	0.24
CG	MOL002141	PLO	316.53	3.49	1	2	14.07	0.69	0.43
DG	MOL008269	2-methyl-5-decanone	310.63	7.99	0	1	20.4	1.42	0.11
CG	MOL001494	Mandenol	308.56	6.99	0	2	42	1.46	0.19
CG	MOL002203	Exceparl M-OL	296.55	7.09	0	2	31.9	1.39	0.16
CG	MOL001641	METHYL LINOLEATE	294.53	6.64	0	2	41.93	1.44	0.17
CG	MOL002161	1-beta-ethylacrylate-7-aldehyde-beta-carboline	294.33	3.03	1	4	28.53	0.45	0.31
CG	MOL000971	Ethylpalmitate	284.54	6.97	0	2	18.99	1.41	0.14
CG	MOL000860	stearic acid	284.54	7.28	1	2	17.83	1.15	0.14
CG	MOL000675	oleic acid	282.52	6.84	1	2	33.13	1.17	0.14
CG	MOL000131	EIC	280.5	6.39	1	2	41.9	1.16	0.14
DG	MOL008259	2,6-di(phenyl)thiopyran-4-thione	280.43	4.62	0	0	69.13	1.74	0.15
CG	MOL002100	(3Z,6S,7R)-3-butylidene-6-butyryl-7-hydroxy-4,5,6,7-tetrahydroisobenzofuran-1-one	278.38	2.69	1	4	3.41	0.08	0.16
CG	MOL002104	Senkyunolide-Q	278.38	2.69	1	4	26.84	0.42	0.16
DG	MOL008267	2-Methylhexadecanoic acid	270.51	6.83	1	2	20.23	1.07	0.11
CG	MOL000879	methyl palmitate	270.51	6.62	0	2	18.09	1.37	0.12
CG	MOL001787	ADO	267.28	-2.02	5	8	15.98	-1.56	0.18
CG	MOL002204	506-43-4	266.52	6.47	1	1	37.76	1.41	0.12
CG	MOL002140	Perlolyrine	264.3	3.2	2	3	65.95	0.88	0.27
CG	MOL001819	METHYL PENTADECANOATE	256.48	6.16	0	2	18.82	1.37	0.1
CG	MOL000069	palmitic acid	256.48	6.37	1	2	19.3	1.09	0.1
DG	MOL000069	palmitic acid	256.48	6.37	1	2	19.3	1.09	0.1
CG	MOL001729	Crysophanol	254.25	2.76	2	4	18.64	0.62	0.21
DG	MOL008264	(E)-octadec-3-ene	252.54	8.14	0	0	19.5	1.86	0.09
CG	MOL002179	4-iodoindoline	245.07	2.29	1	1	26.88	1.79	0.03
CG	MOL002148	senkyunolide-L	242.72	2.52	1	3	29.64	0.63	0.09
DG	MOL004791	Ethol	242.5	6.45	1	1	13.32	1.31	0.08
CG	MOL002149	senkyunolide-S	240.33	0.44	3	4	20.61	-0.46	0.11
CG	MOL002105	Senkyunolide-R	240.28	0.22	3	5	13.14	-0.76	0.11
DG	MOL008277	7,10-PENTADECADIYNOIC ACID	234.37	5.27	1	2	41.5	1.32	0.09
DG	MOL008246	phosphatdic acid	228.11	-1.55	2	8	19.32	-1.22	0.05
DG	MOL008249	phosphatidylinositol_qt	228.11	-1.55	2	8	12.66	-1.15	0.05
CG	MOL002147	senkyunolide-J	226.3	1.57	2	4	21.14	0.02	0.1
CG	MOL002101	Senkyunolide-N	226.3	1.57	2	4	37.27	-0.15	0.1
CG	MOL002210	(3Z,6S,7S)-3-butylidene-6,7-dihydroxy-4,5,6,7-tetrahydroisobenzofuran-1-one	224.28	1.32	2	4	26.78	0	0.1
CG	MOL002152	sinapic acid	224.23	1.6	2	5	64.15	0.48	0.08
DG	MOL001388	(+)-Ledol	222.41	3.2	1	1	16.96	1.43	0.12
CG	MOL000034	2-[(1R,3S,4S)-3-isopropenyl-4-methyl-4-vinylcyclohexyl]propan-2-ol	222.41	3.7	1	1	19.03	1.37	0.07
CG	MOL000165	2-[(2S,5S,6S)-6,10-dimethylspiro[4.5]dec-9-en-2-yl]propan-2-ol	222.41	3.67	1	1	37.62	1.44	0.09
CG	MOL001390	49070_FLUKA	222.41	3.2	1	1	85.51	1.29	0.12
CG	MOL002191	carotol	222.41	3.94	1	1	149.03	1.46	0.09
CG	MOL002178	4,7-Dihydroxy-3-butylphthalide	222.26	2.72	2	4	106.09	0.69	0.1
CG	MOL002144	senkyunolide-D	222.26	1.8	1	4	79.13	0.12	0.1
DG	MOL002144	senkyunolide-D	222.26	1.8	1	4	79.13	0.12	0.1
CG	MOL002182	(-)-spathulenol	220.39	3.01	1	1	25.82	1.45	0.12
CG	MOL002153	1H-Cycloprop(e)azulen-7-ol, decahydro-1,1,7-trimethyl-4-methylene-, (1aR-(1aalpha,4aalpha,7beta,7abeta,7balpha))-	220.39	3.01	1	1	82.33	1.37	0.12
CG	MOL002186	Aromadendrene oxide 2	220.39	3.08	0	1	65.1	1.56	0.14
CG	MOL002165	methyl 2-pentanoylbenzoate	220.29	3.01	0	3	69.28	0.91	0.07
CG	MOL002112	alpha-Selinene	218.42	4.96	0	0	31.81	1.82	0.1
CG	MOL002123	Chuanxiongol	218.27	2.57	1	3	22.19	0.94	0.1
DG	MOL001212	Loxanol V	214.44	5.53	1	1	14.19	1.27	0.05
CG	MOL002199	L-valyl-L-valinc-achydride	214.35	0.47	4	4	40.18	-0.15	0.05
CG	MOL000864	MYS	212.47	7.22	0	0	13.98	1.81	0.05
DG	MOL008244	(1R,2S,4R)-1-ethyl-1-methyl-2,4-bis(1-methylethyl)cyclohexane	210.45	5.57	0	0	15.01	1.8	0.06
CG	MOL002142	sedanoic-acid	210.3	2.58	1	3	44.69	0.37	0.06
CG	MOL002150	1-Acetyl-beta-carboline	210.25	2.34	1	2	67.12	1.18	0.13
CG	MOL001579	germacrene	208.43	5.58	0	0	15.06	1.82	0.06
CG	MOL002124	beta-asarone	208.28	2.74	0	3	35.61	1.45	0.06
CG	MOL002209	Senkyunolide G	208.28	2.54	1	3	39.52	0.63	0.08
CG	MOL002099	Senkyunolide-K	208.28	2.09	1	3	61.75	0.52	0.08
DG	MOL008265	2-valerylbenzoic acid	206.26	2.75	1	3	78.26	0.61	0.06
CG	MOL002181	4-hydroxy-3-butylphthalide	206.26	2.99	1	3	70.31	0.9	0.08
CG	MOL002146	senkyunolide-F	206.26	1.84	1	3	40.35	0.61	0.08
CG	MOL000208	()-Aromadendrene	204.39	4.22	0	0	55.74	1.81	0.1
CG	MOL002096	(+)-ALPHA-FUNEBRENE	204.39	4.12	0	0	52.87	1.79	0.1
DG	MOL008258	(1R,4R,5S)-4-isopropenyl-1,8-dimethylspiro[4.5]dec-8-ene	204.39	4.75	0	0	40.65	1.83	0.07
CG	MOL002116	(1R,4S,5R)-4-isopropenyl-1,8-dimethylspiro[4.5]dec-8-ene	204.39	4.75	0	0	40.01	1.85	0.07
CG	MOL001201	(1R,5R,7S)-4,7-dimethyl-7-(4-methylpent-3-enyl)bicyclo[3.1.1]hept-3-ene	204.39	4.7	0	0	16.23	1.86	0.09
DG	MOL000489	(1S,4aR,8aR)-1-isopropyl-7-methyl-4-methylene-2,3,4a,5,6,8a-hexahydro-1H-naphthalene	204.39	4.8	0	0	19.8	1.86	0.08
CG	MOL002121	(1S,4E,8E,10R)-4,8,11,11-tetramethylbicyclo[8.1.0]undeca-4,8-diene	204.39	4.7	0	0	21.69	1.86	0.08
CG	MOL002132	(2R,4aR)-2-isopropenyl-4a,8-dimethyl-2,3,4,5,6,7-hexahydro-1H-naphthalene	204.39	4.95	0	0	22.13	1.86	0.08
CG	MOL002118	(4aS,7S,8aR)-7-isopropenyl-4a-methyl-1-methylenedecalin	204.39	4.81	0	0	23.65	1.83	0.08
DG	MOL002972	(4S)-1-methyl-4-(6-methylhepta-1,5-dien-2-yl)cyclohexene	204.39	5.33	0	0	20.3	1.89	0.06
CG	MOL000933	.gamma.-Bisabolene	204.39	5.47	0	0	20.78	1.94	0.06
CG	MOL000937	58870_FLUKA	204.39	4.36	0	0	49.01	1.82	0.1
DG	MOL003587	Acoradiene	204.39	4.75	0	0	36.73	1.85	0.07
CG	MOL002085	alpha-Cubebene	204.39	4.17	0	0	16.73	1.83	0.11
CG	MOL000932	alpha-Farnesene	204.39	5.46	0	0	21.7	1.97	0.05
CG	MOL000024	alpha-humulene	204.39	5.04	0	0	22.98	1.88	0.06
DG	MOL008283	aromadendrene	204.39	4.22	0	0	18.21	1.83	0.1
DG	MOL000967	bergamotene	204.39	4.75	0	0	28.51	1.86	0.09
DG	MOL000162	beta-Chamigrene	204.39	4.71	0	0	31.99	1.82	0.08
CG	MOL000908	beta-elemene	204.39	4.79	0	0	25.63	1.84	0.06
CG	MOL000035	beta-Selinene	204.39	4.81	0	0	24.39	1.83	0.08
DG	MOL000035	beta-Selinene	204.39	4.81	0	0	24.39	1.83	0.08
CG	MOL002120	betea-CUBEBENE	204.39	4.22	0	0	32.16	1.82	0.11
DG	MOL006440	bicycloelemene	204.39	4.89	0	0	20.89	1.88	0.08
DG	MOL003534	CADINENE	204.39	4.75	0	0	17.12	1.88	0.08
CG	MOL002190	Cedrene	204.39	4.18	0	0	51.14	1.82	0.11
CG	MOL000204	-cis-.beta.-Elemene diastereomer	204.39	4.79	0	0	28.62	1.85	0.06
DG	MOL002033	cis-Thujopsene	204.39	4.08	0	0	56.43	1.84	0.12
CG	MOL002194	Decahydro-1,6-bis(methylene)-4-(1-methylethyl)-naphthalene	204.39	4.85	0	0	28.34	1.84	0.08
DG	MOL000479	Farnesene	204.39	5.52	0	0	17.42	1.95	0.05
CG	MOL003127	Germacrene D	204.39	5.14	0	0	19.22	1.83	0.06
DG	MOL008256	InChI=1/C15H24/c1-10-7-8-15-9-12(10)14(3,4)13(15)6-5-11(15)2/h7,11-13H,5-6,8-9H2,1-4H	204.39	4.12	0	0	55.56	1.79	0.1
DG	MOL008255	α-acoradiene	204.39	4.51	0	0	40.98	1.82	0.07
DG	MOL008257	α-copaene	204.39	4.17	0	0	29.33	1.83	0.12
CG	MOL002117	β-sesquiphellandrene	204.39	5.14	0	0	23.68	1.89	0.06
DG	MOL008287	(3E)-3-butylidene-7-hydroxy-2-benzofuran-1-one	204.24	2.74	1	3	42.17	1.03	0.08
CG	MOL002098	3-Butylidene-7-hydroxyphthalide	204.24	2.74	1	3	62.68	1	0.08
DG	MOL002098	3-Butylidene-7-hydroxyphthalide	204.24	2.74	1	3	62.68	1	0.08
CG	MOL002143	senkyunolide-C	204.24	2.74	1	3	46.8	0.87	0.08
DG	MOL002143	senkyunolide-C	204.24	2.74	1	3	46.8	0.87	0.08
CG	MOL002145	senkyunolide-E	204.24	1.9	1	3	34.4	0.55	0.08
DG	MOL002145	senkyunolide-E	204.24	1.9	1	3	34.4	0.55	0.08
DG	MOL002029	()-Cuparene	202.37	4.72	0	0	38.26	1.88	0.07
CG	MOL000027	alpha-Curcumene	202.37	5.34	0	0	4.68	1.93	0.06
DG	MOL001302	Usaf hc-1	202.28	2.33	2	4	16.23	-0.01	0.05
DG	MOL008286	()-Camphoric acid	200.26	1.48	2	4	99.13	0.1	0.07
CG	MOL000886	tetradecane	198.44	6.76	0	0	15.94	1.79	0.04
DG	MOL008270	2-methyldodecan-5-one	198.39	4.54	0	1	13.16	1.43	0.04
DG	MOL008266	(Z)-2-Hexenyl hexanoate	198.34	3.99	0	2	19.39	1.26	0.04
DG	MOL008281	(Z)-2-[[(Z)-2-methylbut-2-enoyl]oxymethyl]but-2-enoic acid	198.24	2.15	1	4	77.1	0.49	0.04
CG	MOL000196	L-Bornyl acetate	196.32	2.35	0	2	65.52	1.29	0.08
CG	MOL002207	1(3H)-Isobenzofuranone, 3-butyl-3a,4,5,6-tetrahydro-, cis-(-)-	194.3	3.37	0	2	65.03	1.25	0.07
CG	MOL002173	3(S)-3-Butyl-4,5-dihydrophthalide	194.3	3.64	0	2	25.76	1.28	0.07
CG	MOL002127	Cnidilide	194.3	2.97	0	2	77.55	1.21	0.07
CG	MOL002136	neocnidilide	194.3	3.37	0	2	83.83	1.23	0.07
DG	MOL008251	sedanolide	194.3	3.37	0	2	62.46	1.24	0.07
DG	MOL000360	FER	194.2	1.62	2	4	39.56	0.47	0.06
DG	MOL000389	FERULIC ACID (CIS)	194.2	1.62	2	4	54.97	0.53	0.06
DG	MOL000383	D-Galacturonic acid, homopolymer	194.16	-2.47	5	7	29.75	-2	0.04
DG	MOL008252	senkyunolide	192.28	3.19	0	2	68.28	1.28	0.07
CG	MOL002208	Senkyunolide A	192.28	3.19	0	2	26.56	1.3	0.07
DG	MOL000040	Scopoletol	192.18	1.62	1	4	27.77	0.71	0.08
DG	MOL008285	(3S)-3-butyl-3H-isobenzofuran-1-one	190.26	3.25	0	2	55.05	1.3	0.07
CG	MOL002201	cis-ligustilide	190.26	2.94	0	2	51.3	1.3	0.07
DG	MOL002201	cis-ligustilide	190.26	2.94	0	2	51.3	1.3	0.07
CG	MOL002189	dl-3n-butylphthalide	190.26	3.25	0	2	47.9	1.3	0.07
DG	MOL001314	Azelex	188.25	1.87	2	4	16.9	-0.04	0.04
CG	MOL002122	(Z)-Ligustilide	188.24	3	0	2	53.72	1.3	0.07
CG	MOL002111	BdPh	188.24	3	0	2	42.44	1.32	0.07
DG	MOL002111	BdPh	188.24	3	0	2	42.44	1.32	0.07
CG	MOL000302	Undekansaeure	186.33	4.09	1	2	30.14	0.98	0.03
CG	MOL002174	3,4-epoxy-2,2,7,7-tetramethyl-octane	184.36	3.64	0	1	66.87	1.56	0.05
DG	MOL001224	Tridecylene	182.39	5.91	0	0	17.69	1.83	0.03
CG	MOL000223	caffeic acid	180.17	1.37	3	4	25.76	0.21	0.05
CG	MOL002206	(2-amylphenyl)methanol	178.3	3.54	1	1	55.59	1.26	0.04
CG	MOL000207	Methyleugenol	178.25	2.81	0	2	73.36	1.47	0.04
CG	MOL002196	Hexaphenone	176.28	3.61	0	1	19.88	1.49	0.04
DG	MOL008276	Undecanol-6	172.35	4.15	1	1	25.77	1.19	0.02
DG	MOL001640	NON	172.3	3.63	1	2	26.74	0.96	0.03
CG	MOL002131	2,9-Dimethyldecane	170.38	5.44	0	0	9.93	1.82	0.02
DG	MOL000885	Dodekan	170.38	5.85	0	0	17.74	1.79	0.02
DG	MOL008279	Amyl ketone	170.33	3.83	0	1	18.65	1.31	0.02
CG	MOL002183	5-Propyl-2-thiouracil	170.26	1.25	2	3	77.6	0.93	0.03
DG	MOL008245	DODECENE	168.36	5.46	0	0	17.74	1.8	0.02
CG	MOL000114	vanillic acid	168.16	1.15	2	4	35.47	0.43	0.04
CG	MOL002129	CYCLODODECENE	166.34	5.03	0	0	47.89	1.84	0.03
CG	MOL002193	Cerulignol	166.24	2.95	1	2	62.43	1.42	0.04
DG	MOL007745	WLN: QVR BVQ	166.14	1.04	2	4	17.74	-0.05	0.04
DG	MOL008272	1,1,5-trimethyl-2-formylcyclohexa-2,5-diene-4-one	164.22	1.64	0	2	48.94	0.82	0.04
DG	MOL008268	cis-Isoeugenol	164.22	2.5	1	2	20.73	1.43	0.04
DG	MOL000206	isoeugenol	164.22	2.5	1	2	70.1	1.38	0.04
CG	MOL002113	1,2,3,4,4a,7-Hexahydro-l,6-dimethyl-4-(1-methylethyl)-naphthalene	162.3	3.79	0	0	19.03	1.88	0.05
CG	MOL002107	Valerophenone	162.25	3.15	0	1	42.58	1.46	0.03
DG	MOL000199	Safrol	162.2	2.61	0	2	45.34	1.44	0.05
CG	MOL002188	Dimethyl D-malate	162.16	-0.45	1	5	11.47	0.11	0.03
CG	MOL002159	1-Octanol,2,7-dimethyl-	158.32	3.37	1	1	24.43	1.25	0.02
DG	MOL008261	2,4,6-trimethyl-Octane	156.35	4.78	0	0	29.14	1.81	0.02
DG	MOL008271	3,7-dimethyl-nonane	156.35	4.98	0	0	16.97	1.78	0.02
DG	MOL000121	Decanal	156.3	3.68	0	1	29.81	1.34	0.02
DG	MOL000232	()-alpha-Terpineol	154.28	2.42	1	1	46.3	1.28	0.03
CG	MOL000608	()-Terpinen-4-ol	154.28	2.55	1	1	81.41	1.36	0.03
CG	MOL002126	(1S,4R,5R)-1-isopropyl-4-methyl-4-bicyclo[3.1.0]hexanol	154.28	1.91	1	1	27.22	1.17	0.05
CG	MOL000118	(L)-alpha-Terpineol	154.28	2.42	1	1	48.8	1.39	0.03
CG	MOL000198	(R)-linalool	154.28	2.74	1	1	39.8	1.33	0.02
CG	MOL000922	(R)-p-Menth-1-en-4-ol	154.28	2.55	1	1	32.16	1.33	0.03
CG	MOL000122	1,8-cineole	154.28	2.15	0	1	39.73	1.57	0.05
CG	MOL002160	1-terpineol	154.28	2.42	1	1	49.83	1.24	0.03
CG	MOL002185	7-oxabicyclo-2.2.1-heptane,1-methyl-4-[1-methylethyl]-	154.28	2.28	0	1	60.92	1.53	0.04
CG	MOL002125	cis-Piperitol	154.28	2.66	1	1	43.26	1.27	0.03
CG	MOL002177	trans-Piperitol	154.28	2.66	1	1	47.83	1.19	0.03
CG	MOL001210	(4S)-4-isopropylcyclohexene-1-carbaldehyde	152.26	2.86	0	1	40.36	1.36	0.03
CG	MOL002170	(4S,6S)-cis-Carveol	152.26	2.4	1	1	32.5	1.22	0.03
CG	MOL001223	(S)-2,2,3-Trimethylcyclopent-3-ene-1-acetaldehyde	152.26	2.19	0	1	45.18	1.32	0.03
DG	MOL005608	TMHYDROP	152.21	2.75	2	2	54.42	1.21	0.03
DG	MOL005125	ANN	152.16	1.42	1	3	29.69	0.69	0.03
CG	MOL000635	vanillin	152.16	1.31	1	3	52	0.68	0.03
DG	MOL000635	vanillin	152.16	1.31	1	3	52	0.68	0.03
DG	MOL006869	WLN: QR CQ DV1	152.16	1.03	2	3	36.49	0.67	0.03
CG	MOL002184	(6R)-6-butylcyclohepta-1,4-diene	150.29	3.93	0	0	31.69	1.85	0.02
DG	MOL002184	(6R)-6-butylcyclohepta-1,4-diene	150.29	3.93	0	0	31.69	1.85	0.02
CG	MOL002197	(E,E)-1,3,5-Undecatriene	150.29	4.11	0	0	34.61	1.84	0.02
DG	MOL001273	80-57-9	150.24	1.94	0	1	50.63	1.27	0.06
DG	MOL000478	Eucarvone	150.24	2.07	0	1	53.14	1.35	0.03
DG	MOL000259	o-Thymol	150.24	3.24	1	1	43.28	1.58	0.03
CG	MOL002138	p-Cymen-8-ol	150.24	2.29	1	1	32.26	1.33	0.03
CG	MOL002042	thymol	150.24	3.24	1	1	41.47	1.6	0.03
CG	MOL002139	APH	150.2	0.81	2	3	24.76	1.17	0.03
CG	MOL001752	EUG	150.19	2.1	1	2	38.39	1.36	0.03
CG	MOL001306	o-Acetyl-p-cresol	150.19	1.79	1	2	24.96	1.02	0.03
DG	MOL001306	o-Acetyl-p-cresol	150.19	1.79	1	2	24.96	1.02	0.03
DG	MOL005449	h-Met-h	149.24	-0.27	3	3	70.87	0.06	0.01
CG	MOL002187	Amylbenzene	148.27	4.14	0	0	34.34	1.88	0.03
DG	MOL008280	Isoamylbenzene	148.27	3.94	0	0	35.69	1.84	0.03
DG	MOL000974	cuminal	148.22	2.78	0	1	38.29	1.39	0.03
CG	MOL002134	Isobutyrophenone	148.22	2.7	0	1	80.37	1.46	0.03
DG	MOL008262	Mesitaldehyde	148.22	3.05	0	1	37.8	1.54	0.03
DG	MOL008250	ESEN	148.12	1.3	0	3	47.31	0.56	0.04
CG	MOL002106	1,1-Diethoxybutane	146.26	1.89	0	2	29.28	1.3	0.01
CG	MOL000116	Nonanal	142.27	3.22	0	1	40.28	1.31	0.02
DG	MOL000116	Nonanal	142.27	3.22	0	1	40.28	1.31	0.02
CG	MOL002154	trans-2-Nonen-1-ol	142.27	2.94	1	1	19.96	1.17	0.02
CG	MOL002130	cyclohexane,1,1,2,3-tetramethyl-	140.3	3.7	0	0	48.08	1.77	0.03
CG	MOL002164	2,2,3-Trimethylcyclopent-3-ene-1-carboxaldehyde	138.23	1.95	0	1	42.64	1.31	0.03
CG	MOL000668	PENTYLFURAN	138.23	3.12	0	1	54.59	1.72	0.02
DG	MOL008274	6-Ethylresorcinol	138.18	2.24	2	2	46.45	1.13	0.03
CG	MOL000103	PHB	138.13	1.17	2	3	30.15	0.39	0.03
CG	MOL000125	(-)-alpha-Pinene	136.26	2.87	0	0	46.25	1.85	0.05
DG	MOL000125	(-)-alpha-Pinene	136.26	2.87	0	0	46.25	1.85	0.05
CG	MOL000126	(-)-nopinene	136.26	2.93	0	0	44.84	1.8	0.05
CG	MOL002028	(+)-beta-Phellandrene	136.26	3.31	0	0	40.3	1.83	0.02
CG	MOL000268	(1S,5S)-1-isopropyl-4-methylenebicyclo[3.1.0]hexane	136.26	2.93	0	0	46.21	1.83	0.04
CG	MOL000698	(R)-(-)-alpha-Phellandrene	136.26	3.25	0	0	27.51	1.86	0.02
CG	MOL000200	(S)-(+)-alpha-Phellandrene	136.26	3.25	0	0	27.9	1.87	0.02
DG	MOL008293	1,5,5,6-tetramethyl-1,3-Cyclohexadiene	136.26	3	0	0	39.22	1.82	0.03
CG	MOL002133	1,5,5-trimethyl-6-methylenecyclohexene	136.26	3.25	0	0	46.08	1.83	0.03
CG	MOL001055	5-isopropyl-2-methylbicyclo[3.1.0]hex-2-ene	136.26	2.87	0	0	47.19	1.82	0.04
CG	MOL002110	Allocymene	136.26	3.58	0	0	14.89	1.85	0.02
DG	MOL002110	Allocymene	136.26	3.58	0	0	14.89	1.85	0.02
CG	MOL002119	Artemisia triene	136.26	3.24	0	0	42.1	1.84	0.02
DG	MOL004723	beta-Terpinene	136.26	3.5	0	0	42.29	1.85	0.02
CG	MOL000270	CHEBI:7	136.26	2.87	0	0	45.2	1.84	0.04
DG	MOL000270	CHEBI:7	136.26	2.87	0	0	45.2	1.84	0.04
CG	MOL000019	D-Camphene	136.26	2.93	0	0	34.98	1.81	0.04
DG	MOL000023	Hemo-sol	136.26	3.5	0	0	39.84	1.83	0.02
CG	MOL000234	L-Limonen	136.26	3.5	0	0	38.09	1.83	0.02
CG	MOL000202	Moslene	136.26	3.45	0	0	33.02	1.88	0.02
DG	MOL000202	Moslene	136.26	3.45	0	0	33.02	1.88	0.02
CG	MOL000197	Myrcene	136.26	3.69	0	0	24.96	1.84	0.02
DG	MOL000197	Myrcene	136.26	3.69	0	0	24.96	1.84	0.02
CG	MOL000201	p-Ocimene	136.26	3.63	0	0	15.06	1.85	0.02
DG	MOL000201	p-Ocimene	136.26	3.63	0	0	15.06	1.85	0.02
CG	MOL000264	Tereben	136.26	3.64	0	0	29.62	1.86	0.02
CG	MOL000911	Terpilene	136.26	3.45	0	0	33.95	1.84	0.02
CG	MOL002202	tetramethylpyrazine	136.22	0.66	0	2	20.01	1.19	0.03
CG	MOL001788	adenine	135.15	-0.58	3	4	62.81	-0.3	0.03
DG	MOL001788	adenine	135.15	-0.58	3	4	62.81	-0.3	0.03
CG	MOL002108	(1S,5S)-7,7-dimethyl-2-methylenebicyclo[3.1.1]hept-3-ene	134.24	2.48	0	0	37.71	1.8	0.05
CG	MOL002128	1,3,8-p-Menthatriene	134.24	3.25	0	0	35.86	1.86	0.02
CG	MOL000117	Cymol	134.24	3.51	0	0	27.2	1.86	0.02
DG	MOL000117	Cymol	134.24	3.51	0	0	27.2	1.86	0.02
CG	MOL000712	o-Cymol	134.24	3.51	0	0	51.89	1.88	0.02
DG	MOL008291	2,4-Xylylaldehyde	134.19	2.56	0	1	39.33	1.42	0.03
DG	MOL005589	3,4-DIMETHYLBENZALDEHYDE	134.19	2.56	0	1	39.99	1.4	0.02
DG	MOL005590	ETHYLBENZALDEHYDE	134.19	2.53	0	1	40.95	1.4	0.02
DG	MOL008263	Isoxylaldehyde	134.19	2.56	0	1	38.85	1.39	0.02
CG	MOL002163	WLN: 2VR	134.19	2.24	0	1	60.17	1.45	0.02
CG	MOL002171	2-Methylbenzoxazol	133.16	1.62	0	2	65.25	1.31	0.03
DG	MOL008275	5-Indolol	133.16	1.86	2	1	63.14	1.38	0.03
CG	MOL002168	2-Methyl-1-phenylpropene	132.22	3.23	0	0	20.17	1.89	0.02
CG	MOL002180	4-Octanone	128.24	2.46	0	1	19.37	1.37	0.01
DG	MOL002180	4-Octanone	128.24	2.46	0	1	19.37	1.37	0.01
CG	MOL000710	OYA	128.24	2.77	0	1	19.07	1.3	0.01
CG	MOL002172	(5S,6R)-5,6-dimethyltetrahydropyran-2-one	128.19	1.43	0	2	48.07	1.15	0.02
DG	MOL008273	4-Methyl-6-hepten-3-one	126.22	2.07	0	1	78.38	1.39	0.01
CG	MOL002176	Methyl 3-furoate	126.12	0.79	0	3	77.82	1.03	0.02
CG	MOL002167	WLN: T5OJ BVO1	126.12	1.08	0	3	49.41	1.12	0.02
CG	MOL002162	2-Propionylfuran	124.15	1.63	0	2	63.12	1.21	0.02
DG	MOL002983	Guasol	124.15	1.55	1	2	51.6	1.28	0.02
DG	MOL000421	nicotinic acid	123.12	0.28	1	3	47.65	0.34	0.02
DG	MOL004474	Maruzen M	122.18	2.51	1	1	48.44	1.57	0.02
DG	MOL008292	m-Ethylphenol	122.18	2.51	1	1	51.3	1.55	0.02
DG	MOL008260	o-Xylenol	122.18	2.54	1	1	53.13	1.62	0.02
CG	MOL002115	m-Ethyltoluene	120.21	3.26	0	0	50.77	1.87	0.02
DG	MOL001578	Hypnon	120.16	1.57	0	1	48.19	1.36	0.02
DG	MOL000346	succinic acid	118.1	-0.41	2	4	29.62	-0.44	0.01
CG	MOL002137	OCT	114.26	4.02	0	0	29.72	1.78	0.01
CG	MOL000705	WLN: VH6	114.21	2.31	0	1	19.59	1.29	0.01
DG	MOL000705	WLN: VH6	114.21	2.31	0	1	19.59	1.29	0.01
CG	MOL001744	uracil	112.1	-1.01	2	4	42.53	0.05	0.02
DG	MOL004479	o-cresol	108.15	2.05	1	1	62.45	1.57	0.02
DG	MOL002830	PCR	108.15	2.05	1	1	51.99	1.56	0.01
CG	MOL001335	WLN: Q1R	108.15	1.23	1	1	58.68	1.08	0.01
CG	MOL002169	2-methyl-5-(1-methylene)-1,3-cyclohexadiene	106.18	2.17	0	0	39.91	1.83	0.03
DG	MOL008282	Tropone	106.13	1.14	0	1	47.41	1.25	0.01
CG	MOL002198	Heptan	100.23	3.57	0	0	41.8	1.77	0
CG	MOL002166	ISOHEPTANE	100.23	3.36	0	0	59.94	1.81	0.01
CG	MOL000666	hexanal	100.18	1.85	0	1	55.71	1.25	0.01
CG	MOL002097	gem-Dimethylcyclopentane	98.21	2.74	0	0	41.22	1.78	0.01
CG	MOL002175	3-cyclohexen-1-ol	98.16	1.06	1	1	70.57	1.14	0.01
CG	MOL000172	Furol	96.09	0.99	0	2	34.35	1.08	0.01
DG	MOL002998	IPH	94.12	1.56	1	1	36.05	1.5	0.01
DG	MOL008284	BUA	88.12	0.89	1	2	21.62	0.69	0
DG	MOL002480	Methylbutenol	86.15	0.84	1	1	54.58	1.12	0.01
DG	MOL004734	Butal	72.12	0.94	0	1	68.66	1.18	0
CG	MOL002156	TML	59.13	0.32	0	1	59.98	1.78	0
